# Supplementary material
Source: Royal Society of Chemistry journal article supplement (doi:10.1039/d6mh00268d)
Supplement: d6mh00268d1.pdf [file d6mh00268d1.pdf]

## Supporting Information for Continued Challenges in High-Throughput Materials Predictions: MatterGen predicts compounds from the training dataset.

Mikkel Juelsolt<sup>1,2,\*</sup>

<sup>1</sup>Department of Chemistry, Humboldt University of Berlin, Berlin, Germany.

<sup>2</sup>Department of Heterogeneous Catalysis, Max-Planck-Institut für Kohlenforschung, Mülheim an der Ruhr, Germany

[mikkel.juelsolt@hu-berlin.de](mailto:mikkel.juelsolt@hu-berlin.de)

**Table S1:** Refined parameters for the Rietveld refinement in Figure 2A.

$\text{Ta}_{0.43}\text{Cr}_{0.57}\text{O}_2$   $P4_2/mnm$   
 $a = b = 4.6520(15) \text{ \AA}$   $c = 3.03050(12) \text{ \AA}$

| Atom               | x          | y          | z | Occ        | $B_{\text{iso}}$ |
|--------------------|------------|------------|---|------------|------------------|
| Cr                 | 0          | 0          | 0 | 0.57 (2)   | 0.88 (7)         |
| Ta                 | 0          | 0          | 0 | 0.43 (2)   | 0.88 (7)         |
| O1                 | 0.302 (11) | 0.302 (11) | 0 | 1          | 0.8 (4)          |
| Zero error         | 0.0513 (1) |            |   |            |                  |
| U                  | V          | W          | Y | X          | Z                |
| -0.045 (15)        | 0.090 (15) | -0.285 (3) | 0 | 0.180 (17) | 0                |
| Simple axial model | 13 (1)     |            |   |            |                  |

$\text{Cr}_2\text{O}_3$   $R-3c$  (Hexagonal setting)  
 $a = b = 4.9625 (15) \text{ \AA}$   $c = 13.5960 (12) \text{ \AA}$

| Atom               | x          | y          | z          | Occ        | $B_{\text{iso}}$ |
|--------------------|------------|------------|------------|------------|------------------|
| Cr                 | 0          | 0          | 0.346 (11) | 1          | 0.88 (7)         |
| O1                 | 0.303      | 0          | 0.25       | 1          | 0.8 (4)          |
| Zero error         | 0.0513 (1) |            |            |            |                  |
| U                  | V          | W          | Y          | X          | Z                |
| -0.045 (15)        | 0.090 (15) | -0.285 (3) | 0          | 0.180 (17) | 0                |
| Simple axial model | 13 (1)     |            |            |            |                  |

**Table S2:** Table of fixed Atomic Displacement Parameters used for quantifying the robustness of the refinement.

| Fixed ADP value | Refined occupancies | $R_{\text{Bragg}}$ (%) for $\text{Ta}_{1-x}\text{Cr}_x\text{O}_2$ |
|-----------------|---------------------|-------------------------------------------------------------------|
| 0.1             | Ta 0.41 Cr 0.59     | 4.95                                                              |
| 0.3             | Ta 0.41 Cr 0.59     | 4.09                                                              |
| 0.5             | Ta 0.42 Cr 0.58     | 3.28                                                              |
| 0.7             | Ta 0.42 Cr 0.58     | 2.52                                                              |
| 0.9             | Ta 0.43 Cr 0.57     | 1.81                                                              |
| 1.1             | Ta 0.44 Cr 0.56     | 1.78                                                              |
| 1.3             | Ta 0.44 Cr 0.56     | 2.46                                                              |
| 1.5             | Ta 0.44 Cr 0.56     | 3.25                                                              |
